# Supplementary material for: Origin of the enhanced photocatalytic activity of (Ni, Se, and B) mono- and co-doped anatase TiO2 materials under visible light: a hybrid DFT study
Source: Royal Society of Chemistry journal article supplement (doi:10.1039/d0ra07781j), 2020-01-01
Supplement: d0ra07781j1.pdf [file d0ra07781j1.pdf]

## Supplementary Information

### **Origin of the enhanced photocatalytic activity of (Ni, Se, and B) mono- and co-doped anatase TiO<sub>2</sub> materials under visible light: a hybrid DFT study**

Hanan H. Ibrahim<sup>a</sup>, Adel A. Mohamed<sup>a</sup>, Ismail A. M. Ibrahim<sup>a,\*</sup>

<sup>a</sup>Department of Chemistry, Faculty of Science, Helwan University, 11795 Cairo, Egypt.

\* Corresponding Author:

E-mail address: [ismail.ibrahim@science.helwan.edu.eg](mailto:ismail.ibrahim@science.helwan.edu.eg) (Ismail Ibrahim)

## Fractional coordinates of the most stable co-doped structures

Ni/B<sub>sub</sub> co-doped TiO<sub>2</sub>

1.01695753293575

11.3280000686999998 0.0000000000000000 0.0000000000000000

0.0000000000000000 11.3280000686999998 0.0000000000000000

0.0000000000000000 0.0000000000000000 9.4759998321999994

Ni B O Ti

1 1 70 35

Direct

0.3303164252404370 0.4166666570000004 0.3862727494893621

0.4803919689669343 0.4166666570000004 0.3387806771587237

0.8415184951984904 0.4166666570000004 0.3252368537363235

0.0004004640286611 0.0855348826225875 0.1685189431694904

0.0000783262616151 0.9166666870000029 0.8312536392197959

0.1664033206442186 0.9166666870000029 0.6698221440513576

0.1666465226846163 0.0830945778625378 0.3315519818903715

0.0021962931532078 0.2493980373065186 0.4194715683090601

0.3326763340064379 0.0824393717646268 0.5823837958738080

0.1644946038666579 0.0833050560255336 0.9208093848348409

0.1735971883627712 0.2523362611624524 0.0819598101738040

0.9996391917712066 0.0826636870404575 0.5813441224026002

0.3357059627103646 0.2480891409153221 0.4213349566770108

0.1656987725062233 0.2460806941025993 0.6695923362402469

0.9998964626899423 0.2504705486324110 0.8320808297527127

0.9954640312451394 0.4166666570000004 0.1547416957979796

0.9998964626899423 0.5828627643675861 0.8320808297527127  
0.1656987725062233 0.5872526188973980 0.6695923362402469  
0.1623472061371337 0.4166666570000004 0.3160187047351515  
0.6632781581031343 0.2504739085808771 0.4193828363847822  
0.6673748389815264 0.0828973921695777 0.5812501716592833  
0.5003733407323470 0.0827946023590573 0.9196062998827100  
0.8325146286274109 0.2495521510093895 0.0790234594054610  
0.4971665023385065 0.2517975965566904 0.0820710601244764  
0.8334296052309084 0.0826251416189145 0.9181790412548824  
0.1666465226846163 0.7502387581374648 0.3315519818903715  
0.0004004640286611 0.7477984533774154 0.1685189431694904  
0.3334537255862152 0.0830359524750746 0.1686279271944827  
0.6664600179381432 0.9166666870000029 0.8310126163923257  
0.8334092511831245 0.9166666870000029 0.6690365045335968  
0.5005051069061998 0.0827032939998862 0.3309897681816434  
0.0021962931532078 0.5839352756934785 0.4194715683090601  
0.3326763340064379 0.7508939642353757 0.5823837958738080  
0.1644946038666579 0.7500282799744690 0.9208093848348409  
0.1735971883627712 0.5809970518375449 0.0819598101738040  
0.8332832237942668 0.0841052509121837 0.3308222769304063  
0.4999669868783796 0.9166666870000029 0.6695305433635707  
0.3329762346949731 0.9166666870000029 0.8331517278514036  
0.6665769849153506 0.0842372627119526 0.1684603274627395  
0.9996391917712066 0.7506696489595454 0.5813441224026002  
0.3357059627103646 0.5852441720846752 0.4213349566770108

0.4999180336614180 0.2490523016660107 0.6687877977562431  
0.3329597562135392 0.2459921742634936 0.8331889846584031  
0.1679897871905386 0.4166666570000004 0.9140645763620077  
0.1667140513475854 0.9166666870000029 0.0829054139259642  
0.3339030398887864 0.9166666870000029 0.4198421944367530  
0.0026808038887327 0.4166666570000004 0.5800861461440090  
0.6664235727612051 0.2476454127704212 0.8314679458200637  
0.8337524842451610 0.2486224300528579 0.6678539819339706  
0.3270433349614346 0.4166666570000004 0.6009314816460090  
0.0003321484628349 0.9166666870000029 0.4181268228053607  
0.6664235727612051 0.5856879002295762 0.8314679458200637  
0.8337524842451610 0.5847108829471390 0.6678539819339706  
0.6632781581031343 0.5828594044191201 0.4193828363847822  
0.6673748389815264 0.7504359438304252 0.5812501716592833  
0.5003733407323470 0.7505387336409453 0.9196062998827100  
0.8325146286274109 0.5837811619906080 0.0790234594054610  
0.4999180336614180 0.5842810113339864 0.6687877977562431  
0.3329597562135392 0.5873411387365036 0.8331889846584031  
0.6732142024179788 0.4166666570000004 0.1702987722268483  
0.4971665023385065 0.5815357164433068 0.0820710601244764  
0.8334296052309084 0.7507081943810883 0.9181790412548824  
0.8332832237942668 0.7492280850878188 0.3308222769304063  
0.6665769849153506 0.7490960732880501 0.1684603274627395  
0.8307807296254262 0.4166666570000004 0.9147666652321507  
0.4994600182668516 0.9166666870000029 0.0822609778983513

0.6663359089699450 0.9166666870000029 0.4185037258691292  
0.6704315444322833 0.4166666570000004 0.5868702380265658  
0.3334537255862152 0.7502973835249277 0.1686279271944827  
0.5005051069061998 0.7506300420001165 0.3309897681816434  
0.8338978637819873 0.9166666870000029 0.0818310643642520  
0.4987329783299383 0.4166666570000004 0.9100674910261928  
0.0016116196048755 0.0828814196036208 0.3742309518516133  
0.0015470983470307 0.9166666870000029 0.6257308331632074  
0.1669479076533869 0.9166666870000029 0.8759749935432696  
0.1674667973891612 0.0832350886935808 0.1255699661706939  
0.0012945542893149 0.2479257714976060 0.6252870764951122  
0.3337861541765624 0.0858811056247751 0.3785958725659133  
0.1674214153936746 0.2501207311414693 0.8749151432327584  
0.3321369475728700 0.2532945875612699 0.6227432515157024  
0.0043100054001597 0.4166666570000004 0.3789151829257197  
0.0012945542893149 0.5854075415023912 0.6252870764951122  
0.1674214303936722 0.5832125818585280 0.8749151432327584  
0.1477021495774397 0.4166666570000004 0.1223730573279771  
0.6663624853672251 0.2470699655282155 0.6277464883618428  
0.6668599621518690 0.0827392877863700 0.3737430026439422  
0.4976953747693289 0.0825763881587709 0.1263142113373190  
0.8333543238580287 0.2480123460984955 0.8730113391545157  
0.4965561914811097 0.2467993857512243 0.8723929026367175  
0.8328508690686032 0.0830417645825340 0.1251716831949348  
0.1674667973891612 0.7500982473064215 0.1255699661706939

0.0016116196048755 0.7504519163963820 0.3742309518516133  
0.6671116346633141 0.9166666870000029 0.6261109409269299  
0.8328769773765247 0.9166666870000029 0.8740274688399418  
0.3337861541765624 0.7474522303752273 0.3785958725659133  
0.4978663272571621 0.9166666870000029 0.8744041027641234  
0.3332196133048583 0.9166666870000029 0.6222938466829171  
0.3321369475728700 0.5800387254387273 0.6227432515157024  
0.6663624853672251 0.5862633474717815 0.6277464883618428  
0.8333543238580287 0.5853209669015017 0.8730113391545157  
0.5234550488498687 0.4166666570000004 0.1081135278530313  
0.6668599621518690 0.7505940482136325 0.3737430026439422  
0.4976953747693289 0.7507569478412319 0.1263142113373190  
0.8323623548827459 0.4166666570000004 0.1172014224516298  
0.4965561914811097 0.5865339272487731 0.8723929026367175  
0.6797021527347569 0.4166666570000004 0.3878782029589384  
0.8328508690686032 0.7502915714174685 0.1251716831949348

Ni/B<sub>int+Sub</sub> co-doped TiO<sub>2</sub>

1.01997553460240

11.3280000686999998 0.0000000000000000 0.0000000000000000

0.0000000000000000 11.3280000686999998 0.0000000000000000

0.0000000000000000 0.0000000000000000 9.4759998321999994

Ni B O Ti

1 2 70 35

Direct

0.6617515429343529 0.4175549629787163 0.3781638781922014

0.8343627771738203 0.7524589675392055 0.5256366123557670

0.8170816608413469 0.4204937433367473 0.3398523316936477

-0.0000213337601212 0.0830215367086370 0.1695417404842634

0.0004232383592875 0.9173990662066509 0.8321369499214576

0.1651927637198798 0.9110969892479098 0.6673582705924623

0.1673219036082844 0.0848798355493109 0.3296395579465775

0.9955541659174921 0.2498977686883176 0.4160597030152597

0.3329212727107136 0.0811998759259699 0.5814952760326553

0.1670307276270099 0.0826261500635727 0.9159738137968584

0.1670566097457014 0.2496620907726433 0.0772469548095345

0.0049426021839875 0.0857219867292029 0.5808772790749025

0.3355014969126618 0.2489174443311124 0.4199044978906324

0.1679983322515399 0.2478807711423704 0.6678211045002271

0.9995411512172320 0.2493558782291619 0.8307553947149835

0.0077411588242286 0.4169748440185562 0.1677242794894608

0.9983380638094764 0.5830285731988830 0.8307039073839063

0.1648928253288267 0.5904234953335882 0.6664623435637682  
0.1773659322580682 0.4167979139234181 0.3229045080107530  
0.6673334464305424 0.2429124810694854 0.4214337625806087  
0.6629820296725812 0.0830742175352996 0.5852014879380032  
0.4984670815575113 0.0825089911830414 0.9184632255989339  
0.8318809506793465 0.2506570888549393 0.0831982387530065  
0.5056005916258508 0.2517922549966292 0.0798840085044551  
0.8337922162168232 0.0848203842029523 0.9208638112488440  
0.1707106008703390 0.7502608690112403 0.3289320181944714  
0.9896760320759410 0.7483837129388865 0.1782450506520127  
0.3339502778660750 0.0837092354640128 0.1673055117613697  
0.6671568605560533 0.9169831558317530 0.8339213486703825  
0.8346936598223038 0.9403827969537516 0.6722096873022616  
0.4989791588327423 0.0820415747173572 0.3295519651898425  
0.0087779764576192 0.5866420366376908 0.4247483067347393  
0.3324544420485182 0.7504021144450708 0.5782285263535348  
0.1666771840987259 0.7505017013855387 0.9166266088425776  
0.1641656351692110 0.5824757352933385 0.0769034210582483  
0.8342143558195424 0.0761216011326668 0.3324443130451916  
0.5021461737142836 0.9090415067219050 0.6686044109146416  
0.3334299790287507 0.9175074119540824 0.8292632723900650  
0.6673316078081958 0.0831032556132765 0.1696269011767024  
0.9457974920710045 0.7520658913302242 0.5836352479224638  
0.3362017300288069 0.5841504392176777 0.4177709086362746  
0.4984356260429333 0.2455949976602067 0.6695384516088709



0.3333646794043694 0.2507214970120630 0.8322110739936057  
0.1653793169557160 0.4167404241375937 0.9121595029397553  
0.1659571654904761 0.9179221048994223 0.0800563974396453  
0.3325506788941826 0.9169631809247191 0.4178699988277392  
0.0084689949459504 0.4139169762622635 0.5859111895384324  
0.6659352351615843 0.2453071519797380 0.8321260095462621  
0.8322431947438791 0.2496060706747708 0.6684371469443333  
0.3345500003137787 0.4177038803989060 0.5799131833622286  
0.0088462335209508 0.9142940307903576 0.4246747279773551  
0.3311215316869283 0.4196130746278006 0.1518919003819983  
0.6663623372190526 0.5879177402794419 0.8315486873188676  
0.8322523400539188 0.5630232345370965 0.6674804086574819  
0.4954024158574412 0.4155354279222262 0.3151152124704825  
0.6490778735679413 0.5986003773619973 0.4327958596738067  
0.7260989092299077 0.7564027965610871 0.5877313066871522  
0.4980693639917689 0.7502374083651518 0.9191603456800967  
0.8321754311597687 0.5802041758596804 0.0791041608745405  
0.4992328334029549 0.5918507906511374 0.6696078274170468  
0.3325230305254244 0.5817346837617918 0.8301804506261995  
0.5088158123919453 0.5813656666636375 0.0806054302716024  
0.8331780115403030 0.7500389809287767 0.9147030693081182  
0.8336711305254257 0.7497154845123267 0.3829929392858141  
0.6768630121280549 0.7500112948667115 0.1776547474282738  
0.8268554956137970 0.4143377526111773 0.9107582067246685  
0.5021958035584746 0.9170658910888057 0.0810461924433450

0.6571003639042867 0.9141177099081360 0.4273198769498124  
0.6527398368191274 0.4128862996924145 0.5958818441887770  
0.3343728020937140 0.7478236642839851 0.1616349346093148  
0.4956640114246310 0.7551928299167560 0.3276478577582642  
0.8343284600254766 0.9171641141860033 0.0803762183655322  
0.5029029211610239 0.4170770203730033 0.9119345068161216  
0.0030438307274823 0.0821643555480272 0.3701436673415305  
0.0002782626311954 0.9303781189644238 0.6283224947447070  
0.1677099369237000 0.9175148971752780 0.8746446794452249  
0.1683032169858954 0.0828856662242361 0.1222663212949445  
0.0005606901139324 0.2496883872084823 0.6303400251142782  
0.3345838839931596 0.0834684636214981 0.3742359066301609  
0.1687858208513153 0.2492186605042700 0.8735139641734099  
0.3333016238849905 0.2476227400332815 0.6252756591285279  
0.0095743377908356 0.4117180406530888 0.3761124225177644  
0.9982996086853542 0.5699536798113602 0.6279670513742275  
0.1673903274073199 0.5825530743919599 0.8724541335938754  
0.1680564365013768 0.4176011647749353 0.1176892919902331  
0.6642455592781126 0.2496653334887336 0.6249467679231077  
0.6654692948548984 0.0872527109206809 0.3733532176527422  
0.4991735368087206 0.0829453142168008 0.1235318449771628  
0.8304778476633952 0.2492035794677225 0.8709058301492686  
0.5006596652455778 0.2507879721301989 0.8740112987403562  
0.8322237758846696 0.0836827584470909 0.1285004814657058  
0.1709529843006124 0.7497419682892337 0.1175904166583541

0.0132935219704367 0.7487725981763769 0.3685932992735116  
0.6663752832806777 0.9278664830968153 0.6282251315977245  
0.8337162235754892 0.9252040991688519 0.8736586527506239  
0.3346594561276149 0.7503591855664986 0.3778330990449524  
0.5004723869606544 0.9178348785311659 0.8753250517175950  
0.3326387524054783 0.9171443304788833 0.6247366552537592  
0.3324583795537495 0.5832489622971920 0.6250859830070459  
0.3375450417071175 0.4169818718599909 0.3779899277547763  
0.6629500119937446 0.5667989363885685 0.6245388246066537  
0.8309697908797947 0.5762840091939405 0.8700992740468260  
0.4832069385703751 0.4168685052465380 0.1217848168521556  
0.6541301278319033 0.7526304917436062 0.3707675364616926  
0.4943095584202358 0.7493585455666039 0.1189285120201973  
0.8547257967174243 0.4145749843884617 0.1162293898994659  
0.5020848834343294 0.5822150114287277 0.8737294868125495  
0.8318888145686145 0.7495263538825738 0.1046787809313852

Se/B<sub>sub</sub> co-doped TiO<sub>2</sub>

1.01928471735426

11.3280000686999998 0.0000000000000000 0.0000000000000000

0.0000000000000000 11.3280000686999998 0.0000000000000000

0.0000000000000000 0.0000000000000000 9.4759998321999994

Se B O Ti

1 1 71 35

Direct

0.3284695902278227 0.4166666570000004 0.3697158209878578

0.4967064582027374 0.4166666570000004 0.3728133635656856

0.8395342470813402 0.4166666570000004 0.3174224831044102

0.9993544018780622 0.0846741362361418 0.1693313120256942

0.0009660529708891 0.9166666870000029 0.8308057502410821

0.1672879672244053 0.9166666870000029 0.6699730021971222

0.1663870779015950 0.0857381376603768 0.3314436144077126

0.9943827666113580 0.2476695184741456 0.4224391205381299

0.3323264848589852 0.0814850095029456 0.5809882190585207

0.1664871592979451 0.0822310409029156 0.9194385897004697

0.1670100748384127 0.2498175231250937 0.0779147162021556

0.0022698886354736 0.0817154141449788 0.5819697428851214

0.3441617292485842 0.2474547343470098 0.4238304950460883

0.1672484968155031 0.2471852325770354 0.6685166024274997

0.0006454823507976 0.2499097539522842 0.8320994761260327

0.9906225733691161 0.4166666570000004 0.1230968872934779

0.0006454823507976 0.5834235590477128 0.8320994761260327

0.1672484968155031 0.5861480804229616 0.6685166024274997  
0.1354090149215960 0.4166666570000004 0.3090682072490302  
0.6637331529732499 0.2504318820316984 0.4194115903066872  
0.6682027008265686 0.0825894618016065 0.5803561840324823  
0.5025741902354556 0.0820675755266108 0.9194988752824587  
0.8274044236991881 0.2483200366319416 0.0769310094356266  
0.4991469335242681 0.2495849909025135 0.0816045733298011  
0.8350009685168978 0.0818458706529778 0.9179435196811203  
0.1663870779015950 0.7475951983396261 0.3314436144077126  
0.9993544018780622 0.7486591997638609 0.1693313120256942  
0.3326918445406514 0.0839182499296839 0.1688439863440786  
0.6675790460124803 0.9166666870000029 0.8307598278378125  
0.8341777222407678 0.9166666870000029 0.6687434883124596  
0.5001253233171740 0.0809076523570265 0.3303506386031091  
0.9943827666113580 0.5856637945258447 0.4224391205381299  
0.3323264848589852 0.7518483264970570 0.5809882190585207  
0.1664871592979451 0.7511022950970865 0.9194385897004697  
0.1670100748384127 0.5835157898749039 0.0779147162021556  
0.8323382473623281 0.0827784927494029 0.3303391353595871  
0.5014037556348164 0.9166666870000029 0.6695967508494970  
0.3344259769627127 0.9166666870000029 0.8315479001947590  
0.6661282007118269 0.0825564569152991 0.1688652909346986  
0.0022698886354736 0.7516179218550231 0.5819697428851214  
0.3441617292485842 0.5858785786529872 0.4238304950460883  
0.5025794487807871 0.2485566253038916 0.6700221077302844

0.3352794665974703 0.2440680607253450 0.8340972345291655  
0.1711686254385073 0.4166666570000004 0.9092944141295265  
0.1660964043643387 0.9166666870000029 0.0824974221794234  
0.3335992543137116 0.9166666870000029 0.4180376870279184  
0.0001148773162211 0.4166666570000004 0.5840561962100020  
0.6672223361814120 0.2461154171072695 0.8310274029197872  
0.8344729348828223 0.2450442653945314 0.6686068900275222  
0.3340680781526972 0.4166666570000004 0.6113759075876471  
0.9993431717926262 0.9166666870000029 0.4182935078334803  
0.3343165653172174 0.4166666570000004 0.1837826785778399  
0.6672223361814120 0.5872178958927271 0.8310274029197872  
0.8344729348828223 0.5882890476054652 0.6686068900275222  
0.6637331529732499 0.5829014309682988 0.4194115903066872  
0.6682027008265686 0.7507438741983963 0.5803561840324823  
0.5025741902354556 0.7512657604733919 0.9194988752824587  
0.8274044236991881 0.5850132763680557 0.0769310094356266  
0.5025794487807871 0.5847766876961055 0.6700221077302844  
0.3352794665974703 0.5892652522746521 0.8340972345291655  
0.6627638379428554 0.4166666570000004 0.1706077180035634  
0.4991469335242681 0.5837483220974835 0.0816045733298011  
0.8350009685168978 0.7514874653470245 0.9179435196811203  
0.8323382473623281 0.7505548432506001 0.3303391353595871  
0.6661282007118269 0.7507768790847036 0.1688652909346986  
0.8266508984936702 0.4166666570000004 0.9090823049071420  
0.4984422595163444 0.9166666870000029 0.0816963597207319

0.6663543051927567 0.9166666870000029 0.4187226432827096  
0.6789819955871914 0.4166666570000004 0.5870224336017535  
0.3326918445406514 0.7494150860703190 0.1688439863440786  
0.5001253233171740 0.7524256836429838 0.3303506386031091  
0.8330388255221403 0.9166666870000029 0.0809213167203628  
0.5018005953932104 0.4166666570000004 0.9146950214914193  
0.9984993712302681 0.0828667536669084 0.3738586918032037  
0.0023896327353367 0.9166666870000029 0.6256756940015759  
0.1680643366269242 0.9166666870000029 0.8755722564181084  
0.1667981078809373 0.0834866763919153 0.1246148835150907  
0.0025441771029168 0.2457506782679956 0.6264408386294219  
0.3319286100285454 0.0817944013322644 0.3779441012273457  
0.1683916631512407 0.2496062521317345 0.8741397349298251  
0.3357155099690552 0.2533590261970109 0.6290227097544380  
0.9928764730869543 0.4166666570000004 0.3870143414665178  
0.0025441771029168 0.5875826347320018 0.6264408386294219  
0.1683916781512384 0.5837270608682626 0.8741397349298251  
0.1493359626624400 0.4166666570000004 0.1154651447930515  
0.6684789082157400 0.2470583310564944 0.6271334689858062  
0.6657857717322037 0.0822363272644702 0.3735464802995668  
0.4978725026898911 0.0820626768383475 0.1266416072161266  
0.8343787194842890 0.2478825733654747 0.8729760520503659  
0.5011700845037970 0.2460700354301024 0.8749794852517009  
0.8320135134993887 0.0827802656751822 0.1239872427803707  
0.1667981078809373 0.7498466596080873 0.1246148835150907

0.9984993712302681 0.7504665823330943 0.3738586918032037  
0.6682340202636652 0.9166666870000029 0.6253191699449301  
0.8350079661065964 0.9166666870000029 0.8735194245194915  
0.3319286100285454 0.7515389346677380 0.3779441012273457  
0.5021464991571976 0.9166666870000029 0.8743100522723866  
0.3339462014124961 0.9166666870000029 0.6265283665100724  
0.3357155099690552 0.5799742868029855 0.6290227097544380  
0.6684789082157400 0.5862749819435027 0.6271334689858062  
0.8343787194842890 0.5854507396345220 0.8729760520503659  
0.5093367591396607 0.4166666570000004 0.1133264927297943  
0.6657857717322037 0.7510970087355328 0.3735464802995668  
0.4978725026898911 0.7512706591616551 0.1266416072161266  
0.8315324306530331 0.4166666570000004 0.1109509536244732  
0.5011700845037970 0.5872632775698946 0.8749794852517009  
0.6823064658133500 0.4166666570000004 0.3863777638587181  
0.8320135134993887 0.7505530703248200 0.1239872427803707



Se/B<sub>int+sub</sub> co-doped TiO<sub>2</sub>

1.02352557834097

11.3280000686999998 0.0000000000000000 0.0000000000000000

0.0000000000000000 11.3280000686999998 0.0000000000000000

0.0000000000000000 0.0000000000000000 9.4759998321999994

Se B O Ti

1 2 71 35

Direct

0.7016059452869602 0.4238087160855172 0.3252817762038828

0.8356390674295729 0.7544070107871852 0.5298179137406628

0.8509409180222754 0.4676886580639542 0.3343822381636401

0.4878686959993580 0.4148808329060435 0.3128847696006149

0.9996684235467096 0.0819837533687646 0.1710040193070326

0.0017421715934430 0.9156433507176222 0.8340871588509083

0.1652494391144112 0.9112970872796103 0.6687931761946173

0.1665357686072240 0.0832339468900555 0.3291990354846327

0.9999575941689102 0.2492032054452250 0.4172775964435672

0.3333760667962962 0.0821981265104434 0.5814346610658887

0.1671102715714392 0.0813905747276170 0.9172556704821663

0.1670003590950714 0.2470240830838588 0.0769221457270673

0.0053776238452858 0.0864995095851926 0.5817677186718764

0.3313081554102892 0.2492033450933889 0.4191007228521750

0.1672763226170287 0.2496440393153866 0.6674139521172674

0.9996007051790298 0.2451519429702273 0.8281468493192634

0.0026588140399117 0.4020800867329399 0.1681361663116140

0.9990752351980966 0.5863309867156087 0.8288166839190033  
0.1657974639088589 0.5889815070471983 0.6691430438574145  
0.1747234874821016 0.4278487666838966 0.3200138951812466  
0.6582407729837533 0.2298449690957809 0.4298210063479551  
0.6645373478645598 0.0781032204775878 0.5937729781641025  
0.4973207677331176 0.0809603679384592 0.9184714617056133  
0.8330667684064698 0.2457873353012853 0.0785932003067006  
0.4975510888378133 0.2474073550817663 0.0783857311199315  
0.8332311382701234 0.0822889575269337 0.9214903781434605  
0.1720674881540251 0.7557261986087505 0.3271570937983382  
0.9895808605280031 0.7490565964776748 0.1819235319381127  
0.3318984166841601 0.0807129958952435 0.1681325457565298  
0.6667229636346284 0.9159892868722871 0.8369536225106020  
0.8375029687999398 0.9435767320309754 0.6772338254775723  
0.4965096268393407 0.0791631306764889 0.3289732261535983  
0.0234551273011173 0.5947142711068507 0.4340453061586684  
0.3332061125305041 0.7502691511009680 0.5789317234182728  
0.1676780502702953 0.7499281730774520 0.9186108963749887  
0.1586724463514196 0.5836487253649109 0.0780838543394090  
0.8332319467917864 0.0754832690898139 0.3327921219606689  
0.5006999597458929 0.9082823617129755 0.6703982162107219  
0.3327570297674590 0.9175224941104935 0.8298468254260444  
0.6656629913366096 0.0809657641452612 0.1710999086280375  
0.9478588858919301 0.7565539323205858 0.5855471583077454  
0.3367112522695988 0.5860680970162233 0.4184075489900435

0.4966687822545370 0.2477706582391314 0.6690913312231618  
0.3316078178490610 0.2492366238773825 0.8299357875894963  
0.1624628502000234 0.4158747760946942 0.9136002753426247  
0.1634567485721821 0.9154445264965105 0.0801415938660752  
0.3310368277612381 0.9175411324086379 0.4212103494211130  
0.0065197617086259 0.4139866655111843 0.5848310071643669  
0.6647061743991357 0.2435286109672140 0.8342353584380902  
0.8322510079889041 0.2467729990504905 0.6670095323668710  
0.3324899532741620 0.4181980046761674 0.5777585981907538  
0.0088105043171183 0.9163960595552104 0.4268919741310279  
0.3281502901977004 0.4141549034308376 0.1514921937455264  
0.6664345526040393 0.5852567254973912 0.8346263838857579  
0.8335153994616902 0.5682777087063482 0.6648309002905667  
0.6314094058371608 0.6167611971042055 0.4529047315365243  
0.7309671042297197 0.7645068706988019 0.5951355687282293  
0.4977697590732511 0.7495836858006493 0.9182493477989858  
0.8425445546975879 0.5828553416181336 0.0704706383223081  
0.4960169308822160 0.5852939982569240 0.6748999926808928  
0.3304470258491430 0.5813371013836350 0.8318076241635721  
0.6704006440339422 0.4223171192946947 0.1393478963553064  
0.4963870093370266 0.5834069518969811 0.0802796663388181  
0.8317075989795556 0.7512804734577795 0.9140308027956040  
0.8332382192340150 0.7457063815284979 0.3875881474490439  
0.6775404861526292 0.7442099341119368 0.1783166413173566  
0.8359650660047688 0.4130028585209654 0.9071134384463380

0.5006972008621849 0.9151489703159310 0.0800452157699486  
0.6540402605937381 0.9138531356350453 0.4303619496172256  
0.6632135615016848 0.4117284826358334 0.6030653670920907  
0.3307236650264797 0.7460233519479209 0.1595516222578034  
0.4931301987470209 0.7627697058482451 0.3212072456246101  
0.8342498738834423 0.9159124190105634 0.0822582045786576  
0.4990063681925470 0.4153252070527517 0.9118308190888863  
0.0029120321605988 0.0819376183286487 0.3700496450338770  
0.0000016999557867 0.9310497227299903 0.6313734709193323  
0.1679291661304933 0.9174840433242034 0.8754227613562822  
0.1678279685439659 0.0828848175625951 0.1232186304317134  
0.9973449369056957 0.2481135870583077 0.6318644479787798  
0.3342916196690146 0.0822996221852860 0.3750043933023564  
0.1683153686028749 0.2475670258713836 0.8724042279604555  
0.3312727177345901 0.2508724508614351 0.6225766023287391  
0.0211945267048380 0.4096141092994228 0.3806502549286699  
0.9985103274833569 0.5717141653525510 0.6287808301015144  
0.1669676905943495 0.5825331244539963 0.8733187356394192  
0.1650529719356247 0.4148118885492028 0.1157660654040205  
0.6603710256633992 0.2499919190395873 0.6208421879253113  
0.6634095989755023 0.0790500341632015 0.3766823762021258  
0.4981935337657361 0.0819876937357638 0.1234001287766289  
0.8258537932148736 0.2437400858983370 0.8685068646198003  
0.4980534204258532 0.2490886392270112 0.8737348554528983  
0.8307214359545435 0.0801813102050494 0.1300466596579041

0.1705159228230116 0.7485145352161464 0.1173830792158454  
0.0154456888679426 0.7514226994150208 0.3717290322208858  
0.6661629465694976 0.9257725938564950 0.6361942287224480  
0.8347017378603259 0.9232973535363985 0.8751363624537031  
0.3354236908228239 0.7499951510326602 0.3793322742906444  
0.4988536168810614 0.9174629930424133 0.8765548506919330  
0.3330872938978652 0.9179759303366968 0.6253338868387801  
0.3322347365121057 0.5820317777071534 0.6249489366897900  
0.6612750347735804 0.5640733500908665 0.6308062579908633  
0.8317292626042703 0.5791586275332197 0.8701713366198439  
0.4884618765017459 0.4134457817257851 0.1183645332496718  
0.6533833460413828 0.7566405290225735 0.3727757599287947  
0.4921511285690631 0.7475055687897759 0.1173712693809381  
0.8447938352906987 0.4079725994463462 0.1047943637604404  
0.4981039560505673 0.5815467693815907 0.8761385077951859  
0.8317924213369660 0.7471199023536478 0.1049420323146919  
0.3387510495645866 0.4171263579981137 0.3707085894664002

Ni/Se<sup>2-</sup> co-doped TiO<sub>2</sub>

1.01976996928720

11.3280000686999998 0.0000000000000000 0.0000000000000000

0.0000000000000000 11.3280000686999998 0.0000000000000000

0.0000000000000000 0.0000000000000000 9.4759998321999994

Ni Se O Ti

1 1 70 35

Direct

0.3342533803415238 0.4166666570000004 0.4132540565901957

0.3161445283810591 0.4166666570000004 0.1814059902594802

0.3360856443933697 0.4166666570000004 0.6109117312322393

0.5137037876438020 0.4166666570000004 0.3208036055436378

-0.0001249699776490 0.0789120930319678 0.1694707334462932

0.9994677081502287 0.9166666870000029 0.8293482013904412

0.1659440397138406 0.9166666870000029 0.6668876423641841

0.1669897435492604 0.0840582991595851 0.3286412384098656

0.0055949612485246 0.2522044300469072 0.4184202033958865

0.3356835015376933 0.0809774868432226 0.5817200058470082

0.1706184868064142 0.0791685425663283 0.9147266392244232

0.1461644220152185 0.2460326411524371 0.0670757588394620

0.9976386203673191 0.0825079685429220 0.5788802304315139

0.3303551459467926 0.2495442596826422 0.4296590965521403

0.1666239728205837 0.2437149491460216 0.6655774668958585

0.9987255747480840 0.2426084314871728 0.8271148117607875

-0.0000988161313254 0.4166666570000004 0.1885956512631298

0.9987255747480840 0.5907248815128245 0.8271148117607875  
0.1666239728205837 0.5896183638539755 0.6655774668958585  
0.6677813382940418 0.2478381884989595 0.4218195883506268  
0.6676068509234550 0.0819587228800447 0.5818763152620476  
0.4997775496805831 0.0820717301805301 0.9192384153940897  
0.8393819196421128 0.2491404915262180 0.0801523545744239  
0.5128859230288449 0.2484366528316629 0.0786035190299713  
0.8317662822035070 0.0824624415228254 0.9189952270912394  
0.1669897435492604 0.7492750368404176 0.3286412384098656  
-0.0001249699776490 0.7544212429680349 0.1694707334462932  
0.3326353785374251 0.0912887264174003 0.1670806779819166  
0.6667484042355268 0.9166666870000029 0.8311613039365396  
0.8333302705138881 0.9166666870000029 0.6690236339147875  
0.4995287913936741 0.0847869046214281 0.3306062780242487  
0.0055949612485246 0.5811288829530905 0.4184202033958865  
0.3356835015376933 0.7523558491567804 0.5817200058470082  
0.1706184868064142 0.7541647934336739 0.9147266392244232  
0.1461644220152185 0.5873006718475603 0.0670757588394620  
0.8343226781441471 0.0852296052275511 0.3313834414818154  
0.5010550342983029 0.9166666870000029 0.6689106498723782  
0.3341947379430246 0.9166666870000029 0.8291449233349778  
0.6679067535105642 0.0808858665576639 0.1702590678958839  
0.9976386203673191 0.7508253674570806 0.5788802304315139  
0.3303551459467926 0.5837890533173548 0.4296590965521403  
0.5018585276769064 0.2450222907013550 0.6712614937231721

0.3338049409943185 0.2466486644359067 0.8369799307256964  
0.1579076001292177 0.4166666570000004 0.8938640746076392  
0.1667765610189236 0.9166666870000029 0.0801709989460085  
0.3328400471796079 0.9166666870000029 0.4169184945514079  
0.9979512179115787 0.4166666570000004 0.5878045149845308  
0.6689128486585025 0.2500499069254101 0.8322368455758037  
0.8329623789088167 0.2493864852390200 0.6673813058231796  
0.0013916709080983 0.9166666870000029 0.4172487521630980  
0.6689128486585025 0.5832834060745873 0.8322368455758037  
0.8329623789088167 0.5839468277609771 0.6673813058231796  
0.6677813382940418 0.5854951245010374 0.4218195883506268  
0.6676068509234550 0.7513746131199578 0.5818763152620476  
0.4997775496805831 0.7512616058194723 0.9192384153940897  
0.8393819196421128 0.5841928214737792 0.0801523545744239  
0.8276047738069756 0.4166666570000004 0.3413130507690384  
0.5018585276769064 0.5883110222986422 0.6712614937231721  
0.3338049409943185 0.5866846485640906 0.8369799307256964  
0.6807544858954530 0.4166666570000004 0.1647412529912858  
0.5128859230288449 0.5848966601683342 0.0786035190299713  
0.8317662822035070 0.7508708944771771 0.9189952270912394  
0.8343226781441471 0.7481037307724516 0.3313834414818154  
0.6679067535105642 0.7524474694423388 0.1702590678958839  
0.8410673916459425 0.4166666570000004 0.9196899088287580  
0.4972455860628538 0.9166666870000029 0.0823523433843374  
0.6665838298484104 0.9166666870000029 0.4187757920527385



0.6622375605726908 0.4166666570000004 0.5852642976984187  
0.3326353785374251 0.7420446095826021 0.1670806779819166  
0.4995287913936741 0.7485464313785748 0.3306062780242487  
0.8339912186524212 0.9166666870000029 0.0805410988246010  
0.5018301750405989 0.4166666570000004 0.9160640546185023  
0.0019894833520840 0.0825673211438405 0.3733058229607221  
0.9980794201326734 0.9166666870000029 0.6248564446178975  
0.1670609085934463 0.9166666870000029 0.8689775303308249  
0.1653431306536220 0.0821633755393375 0.1235347003601042  
0.0011027824399793 0.2468131173895886 0.6256856383344979  
0.3338729555439748 0.0872289419411089 0.3781388054693169  
0.1691805080792742 0.2398883686161057 0.8669920003900931  
0.3366002473414719 0.2505512656174629 0.6268783267007340  
0.9752013886197914 0.4166666570000004 0.3893748085661252  
0.0011027824399793 0.5865201956104080 0.6256856383344979  
0.1691805230792719 0.5934449443838912 0.8669920003900931  
0.1359341113122363 0.4166666570000004 0.0816215546275761  
0.6678255940591262 0.2472465305175325 0.6253272720086254  
0.6671849270653066 0.0827703346954745 0.3746692783901758  
0.4978000980237638 0.0833026958645267 0.1254771910182420  
0.8341040456473416 0.2458349963457062 0.8734953421755731  
0.5018540693044133 0.2480847524535340 0.8755580502941691  
0.8324032755238727 0.0823620241899291 0.1265451293567433  
0.1653431306536220 0.7511699604606650 0.1235347003601042  
0.0019894833520840 0.7507660148561620 0.3733058229607221

0.6658939051941820 0.9166666870000029 0.6260903561929813  
0.8317092641515921 0.9166666870000029 0.8745039431820882  
0.3338729555439748 0.7461043940588937 0.3781388054693169  
0.4975174065502112 0.9166666870000029 0.8746041517186063  
0.3347385385293239 0.9166666870000029 0.6208335032266925  
0.3366002473414719 0.5827820473825344 0.6268783267007340  
0.6678255940591262 0.5860867824824648 0.6253272720086254  
0.8341040456473416 0.5874983166542909 0.8734953421755731  
0.5236921116229954 0.4166666570000004 0.1177617377730933  
0.6671849270653066 0.7505630013045282 0.3746692783901758  
0.4978000980237638 0.7500306401354759 0.1254771910182420  
0.8376099926101519 0.4166666570000004 0.1172478082192950  
0.5018540693044133 0.5852485605464630 0.8755580502941691  
0.6595601621406112 0.4166666570000004 0.3849957460297586  
0.8324032755238727 0.7509713118100734 0.1265451293567433

Ni/Se<sup>4+</sup> co-doped TiO<sub>2</sub>

1.01636876247283

11.3280000686999998 0.0000000000000000 0.0000000000000000

0.0000000000000000 11.3280000686999998 0.0000000000000000

0.0000000000000000 0.0000000000000000 9.4759998321999994

Ni Se O Ti

1 1 71 34

Direct

0.3329100038601829 0.4166666570000004 0.3861778794978776

0.9944277302614682 0.4166666570000004 0.3965124423486933

0.5075139342664459 0.4166666570000004 0.3313177244847840

0.9992983459886807 0.0828144914215563 0.1687026781485796

0.9990197575531222 0.9166666870000029 0.8308029301509563

0.1666988143649081 0.9166666870000029 0.6678473861487015

0.1650936667347145 0.0823118907435643 0.3295596879666651

0.9959813275466356 0.2478063762271714 0.4258166967079680

0.3345941480030641 0.0831143905081490 0.5817099274655833

0.1657545534259129 0.0811676953230852 0.9151789079970075

0.1679876878130945 0.2469172562422191 0.0753698029772185

0.9998508148340820 0.0807669066172993 0.5832725370965911

0.3255873723655688 0.2480816932210107 0.4195853851352935

0.1647156711553347 0.2488944083693213 0.6665949700171444

-0.0002366902124215 0.2493575107706771 0.8332627135378461

0.0119413336292726 0.4166666570000004 0.1418731122384586

-0.0002366902124215 0.5839758022293199 0.8332627135378461

0.1647156711553347 0.5844389046306758 0.6665949700171444  
0.6709055725815929 0.2501521865630872 0.4195129217729603  
0.6648140190628511 0.0831401894715762 0.5811154647578111  
0.5003976460014705 0.0838270536961191 0.9204618057247105  
0.8354877506260885 0.2493797203235069 0.0817394168950703  
0.4997921259292349 0.2516980053252061 0.0833775182083126  
0.8315339851976534 0.0828485920066711 0.9185676182451348  
0.1650936667347145 0.7510214452564383 0.3295596879666651  
0.9992983459886807 0.7505188445784459 0.1687026781485796  
0.3330222745721897 0.0832600263466243 0.1678527978281267  
0.6659887594410344 0.9166666870000029 0.8314027379198321  
0.8324256428509829 0.9166666870000029 0.6685986339909814  
0.4997719931992277 0.0858848411032791 0.3319977041538046  
0.9959813275466356 0.5855269367728252 0.4258166967079680  
0.3345941480030641 0.7502189454918536 0.5817099274655833  
0.1657545534259129 0.7521656406769176 0.9151789079970075  
0.1679876878130945 0.5864160567577776 0.0753698029772185  
0.8325232444214136 0.0819098238356913 0.3309285629405024  
0.4999191461085991 0.9166666870000029 0.6692387536266179  
0.3337087373777733 0.9166666870000029 0.8320114338415202  
0.6661091849752491 0.0836912626065268 0.1684920622261497  
0.9998508148340820 0.7525664293827036 0.5832725370965911  
0.3255873723655688 0.5852516197789863 0.4195853851352935  
0.5005022597400568 0.2513012849370107 0.6685491270827090  
0.3337279365283514 0.2452460154168104 0.8304446646694393

0.1783416849721335 0.4166666570000004 0.9059262481738130  
0.1666134779929364 0.9166666870000029 0.0800383565890682  
0.3331005727523768 0.9166666870000029 0.4190723742711286  
0.9845197945777230 0.4166666570000004 0.5782336614695132  
0.6657817735589897 0.2517265137464010 0.8330107940802394  
0.8321477909965048 0.2446576310796625 0.6712551837694777  
0.3316153245548701 0.4166666570000004 0.5882244712193502  
0.9984568869711324 0.9166666870000029 0.4181663942749552  
0.3208601772804237 0.4166666570000004 0.1826994971525950  
0.6657817735589897 0.5816067992535959 0.8330107940802394  
0.8321477909965048 0.5886756819203344 0.6712551837694777  
0.6709055725815929 0.5831811264369100 0.4195129217729603  
0.6648140190628511 0.7501931465284267 0.5811154647578111  
0.5003976460014705 0.7495062823038834 0.9204618057247105  
0.8354877506260885 0.5839535926764904 0.0817394168950703  
0.8537067682212262 0.4166666570000004 0.3350336368339107  
0.5005022597400568 0.5820320280629868 0.6685491270827090  
0.3337279365283514 0.5880872975831867 0.8304446646694393  
0.6736991329913675 0.4166666570000004 0.1732827299646209  
0.4997921259292349 0.5816353076747910 0.0833775182083126  
0.8315339851976534 0.7504847439933314 0.9185676182451348  
0.8325232444214136 0.7514235121643112 0.3309285629405024  
0.6661091849752491 0.7496420733934757 0.1684920622261497  
0.8360114174119465 0.4166666570000004 0.9166850386954501  
0.4994958415029859 0.9166666870000029 0.0824054129408996

0.6655677586145934 0.9166666870000029 0.4184048454431563  
0.6698287743988263 0.4166666570000004 0.5837109374927979  
0.3330222745721897 0.7500733096533783 0.1678527978281267  
0.4997719931992277 0.7474484948967234 0.3319977041538046  
0.8332305693672906 0.9166666870000029 0.0811227406593493  
0.4964544894931440 0.4166666570000004 0.9208451456058281  
0.9980890557253584 0.0809505863665675 0.3705317134024665  
0.0002012911048076 0.9166666870000029 0.6288024601569971  
0.1684164036036719 0.9166666870000029 0.8722119314520422  
0.1684914936607611 0.0824959145108176 0.1252702884440973  
0.9981119716957899 0.2387265458685902 0.6311022698983249  
0.3321172030702528 0.0871765116034388 0.3767270646434602  
0.1680237695464987 0.2430444490863514 0.8704359948374059  
0.3342758304446372 0.2520646477671593 0.6209494728259534  
0.9981119716957899 0.5946067671314073 0.6311022698983249  
0.1680237845464964 0.5902888639136457 0.8704359948374059  
0.1774195378054110 0.4166666570000004 0.0975324759238859  
0.6661332855808629 0.2506504300803226 0.6250073209630627  
0.6647252405452838 0.0834470172088612 0.3759296731354494  
0.4993180315946646 0.0838471448954744 0.1250329419823139  
0.8300701063432583 0.2483878723613393 0.8761412618454647  
0.4976301874331798 0.2514687811358124 0.8758251504404493  
0.8314561954009201 0.0829939249404446 0.1251289230402001  
0.1684914936607611 0.7508374214891850 0.1252702884440973  
0.9980890557253584 0.7523827496334349 0.3705317134024665

0.6661260346002819 0.9166666870000029 0.6248847988528985  
0.8309886238040095 0.9166666870000029 0.8745484531482712  
0.3321172030702528 0.7461568243965635 0.3767270646434602  
0.4978399152856458 0.9166666870000029 0.8760625421697315  
0.3352861250938630 0.9166666870000029 0.6199996869459043  
0.3342758304446372 0.5812686652328379 0.6209494728259534  
0.6661332855808629 0.5826828829196742 0.6250073209630627  
0.8300701063432583 0.5849454406386581 0.8761412618454647  
0.5079299816368235 0.4166666570000004 0.1317156206193060  
0.6647252405452838 0.7498863187911412 0.3759296731354494  
0.4993180315946646 0.7494861911045284 0.1250329419823139  
0.8548950273035991 0.4166666570000004 0.1165762105855372  
0.4976301874331798 0.5818645318641916 0.8758251504404493  
0.8314561954009201 0.7503394110595584 0.1251289230402001  
0.6610003997710918 0.4166666570000004 0.3737492603845780
